# Supplementary material for: Salt tolerance characterization and genome-wide association study of Gossypium barbadense accessions reveal salinity-adaptive variations
Source: Front Plant Sci. 2025 Sep 11;16:1654742. doi: 10.3389/fpls.2025.1654742 (PMC12460099; doi:10.3389/fpls.2025.1654742)
Supplement: Supplementary file 13 [file Table4.xlsx]

## Sheet: Sheet1
Supplementary Table 4. Phylogenetic clustering and salt tolerance index-based classification of 240 G. barbadense accessions.
Accession ID	Origin	Name	NJ tree group	Salt tolerance index (D)	Salt tolerance index (D) group
H1	XinJiang.CHN	CS16-1	G2	0.51	III
H2	XinJiang.CHN	H39025	G4	0.4	III
H3	XinJiang.CHN	CS16-3	G4	0.29	IV
H4	XinJiang.CHN	AW101	G3	0.44	III
H5	XinJiang.CHN	CS16-5	G4	0.45	III
H6	XinJiang.CHN	TH08-285	G4	0.36	IV
H7	XinJiang.CHN	yuanlong-20	G2	0.2	V
H8	XinJiang.CHN	TH12-104	G2	0.18	V
H9	XinJiang.CHN	CF-10	G4	0.31	IV
H10	XinJiang.CHN	ML3973	G2	0.5	III
H11	XinJiang.CHN	y203	G4	0.43	III
H12	XinJiang.CHN	G162	G2	0.23	V
H13	XinJiang.CHN	H39012	G4	0.31	IV
H14	XinJiang.CHN	CQ16-8	G4	0.37	IV
H15	XinJiang.CHN	CQ16-9	G2	0.25	V
H16	XinJiang.CHN	CQ16-10	G4	0.35	IV
H17	XinJiang.CHN	y12-53	G4	0.32	IV
H18	XinJiang.CHN	CQ16-12	G4	0.61	II
H19	XinJiang.CHN	AW06	G3	0.24	V
H20	XinJiang.CHN	CQ16-14	G4	0.09	V
H21	XinJiang.CHN	CQ16-15	G3	0.28	IV
H22	XinJiang.CHN	CF-9	G4	0.39	III
H23	XinJiang.CHN	JSH14-07	G4	0.33	IV
H24	XinJiang.CHN	H38066	G3	0.42	III
H25	XinJiang.CHN	YuanLong-17	G2	0.53	II
H26	XinJiang.CHN	CQ16-20	G2	0.34	IV
H27	XinJiang.CHN	LuTai	G2	0.25	V
H28	XinJiang.CHN	k-426	G4	0.45	III
H29	XinJiang.CHN	H542	G3	0.53	II
H30	XinJiang.CHN	CY16-2	G2	0.43	III
H31	XinJiang.CHN	TH13-255	G2	0.55	II
H32	XinJiang.CHN	YuanLong-25	G2	0.53	II
H33	XinJiang.CHN	CY16-5	G2	0.41	III
H34	XinJiang.CHN	LuChengChangH14-3	G2	0.42	III
H35	XinJiang.CHN	YuanLong-23	G2	0.27	V
H36	XinJiang.CHN	KR16-8	G2	0.5	III
H37	XinJiang.CHN	TianChang-5158	G2	0.29	IV
H38	XinJiang.CHN	KD3093	G2	0.42	III
H39	XinJiang.CHN	k-432	G4	0.44	III
H40	XinJiang.CHN	y227	G4	0.63	I
H41	XinJiang.CHN	LuTai-103F	G3	0.39	III
H42	XinJiang.CHN	k-434	G4	0.57	II
H43	XinJiang.CHN	G210	G3	0.63	I
H44	XinJiang.CHN	LuTai-806F	G3	0.58	II
H45	XinJiang.CHN	CY16-17	G2	0.29	IV
H46	XinJiang.CHN	y12-21	G4	0.39	III
H47	XinJiang.CHN	TH12-354	G3	0.44	III
H48	XinJiang.CHN	ZhongHai-1601	G2	0.36	IV
H49	XinJiang.CHN	CF-12	G4	0.44	III
H50	XinJiang.CHN	TH-290	G3	0.38	III
H51	XinJiang.CHN	AW116	G4	0.53	II
H52	XinJiang.CHN	TH-292	G4	0.61	II
H53	XinJiang.CHN	CY16-25	G2	0.5	III
H54	XinJiang.CHN	CY16-26	G4	0.54	II
H55	XinJiang.CHN	A11-8	G4	0.61	II
H56	XinJiang.CHN	CQ13-16	G4	0.51	III
H57	XinJiang.CHN	16X-3	G4	0.47	III
H58	XinJiang.CHN	16X-4	G2	0.51	III
H59	XinJiang.CHN	CQ14-3	G2	0.66	I
H60	XinJiang.CHN	13Z-3	G4	0.55	II
H61	XinJiang.CHN	16X-8	G4	0.51	III
H62	XinJiang.CHN	16X-9	G4	0.35	IV
H63	XinJiang.CHN	YuanLong-10	G4	0.23	V
H64	XinJiang.CHN	CY15-4	G4	0.45	III
H65	XinJiang.CHN	CY15-22	G4	0.3	IV
H66	XinJiang.CHN	CY15-23	G3	0.36	IV
H67	XinJiang.CHN	CY15-31	G4	0.53	II
H68	XinJiang.CHN	XinHai-78	G2	0.39	III
H69	XinJiang.CHN	16Y-6	G4	0.39	III
H70	XinJiang.CHN	k-138	G4	0.46	III
H71	XinJiang.CHN	ChangFeng-7	G4	0.53	II
H72	XinJiang.CHN	16Y-9	G4	0.35	IV
H73	XinJiang.CHN	CY15-13	G4	0.45	III
H74	XinJiang.CHN	CY15-18	G4	0.26	V
H75	XinJiang.CHN	CY15-26	G3	0.41	III
H76	XinJiang.CHN	AW115	G3	0.39	III
H77	XinJiang.CHN	16Y-14	G3	0.38	III
H78	XinJiang.CHN	16Y-15	G4	0.45	III
H79	XinJiang.CHN	Ta11-177	G4	0.35	IV
H80	XinJiang.CHN	16Y-17	G2	0.19	V
H81	XinJiang.CHN	16Y-18	G4	0.34	IV
H82	XinJiang.CHN	16Z-3	G4	0.46	III
H83	XinJiang.CHN	K-128	G4	0.44	III
H84	XinJiang.CHN	16Z-8	G4	0.83	I
H85	XinJiang.CHN	Ta09-324	G2	0.63	I
H86	XinJiang.CHN	16Z-10	G4	0.54	II
H87	XinJiang.CHN	16Z-11	G4	0.53	II
H88	XinJiang.CHN	H5161	G4	0.24	V
H89	XinJiang.CHN	13Changza18-3	G4	0.45	III
H90	XinJiang.CHN	16Z-15	G4	0.09	V
H91	XinJiang.CHN	16Z-16	G4	0.44	III
H92	XinJiang.CHN	16Z-17	G4	0.43	III
H93	XinJiang.CHN	16Z-18	G4	0.71	I
H94	XinJiang.CHN	K-432	G4	0.65	I
H95	XinJiang.CHN	16G-2	G3	0.49	III
H96	XinJiang.CHN	K-433	G3	0.48	III
H97	XinJiang.CHN	16G-4	G4	0.38	III
H98	XinJiang.CHN	16G-5	G4	0.67	I
H99	XinJiang.CHN	16G-6	G3	0.49	III
H100	XinJiang.CHN	16G-7	G4	0.39	III
H101	XinJiang.CHN	TH-2-32	G3	0.81	I
H102	XinJiang.CHN	16G-12	G3	0.87	I
H103	XinJiang.CHN	LuTai-138F	G3	0.76	I
H104	XinJiang.CHN	14C-679	G2	0.73	I
H105	XinJiang.CHN	Long staple cotton	G3	0.42	III
H106	XinJiang.CHN	LuTaiChang	G4	0.46	III
H107	XinJiang.CHN	Liu2	G3	0.53	II
H108	XinJiang.CHN	KC-1	G4	0.37	IV
H109	XinJiang.CHN	KC-2	G2	0.65	I
H110	XinJiang.CHN	KC-3	G2	0.43	III
H111	XinJiang.CHN	KC-4	G4	0.47	III
H112	XinJiang.CHN	XinHai-21	G2	0.48	III
H113	XinJiang.CHN	XinHai-36	G2	0.54	II
H114	XinJiang.CHN	XinHai-38	G4	0.43	III
H115	XinJiang.CHN	XinHai-46	G4	0.38	III
H116	XinJiang.CHN	XinHai-51	G4	0.43	III
H117	XinJiang.CHN	XinHai-54	G4	0.57	II
H118	XinJiang.CHN	XinHai-17	G4	0.65	I
H119	XinJiang.CHN	AW201	G3	0.67	I
H120	XinJiang.CHN	AW202	G3	0.52	II
H121	XinJiang.CHN	K-435	G3	0.6	II
H122	XinJiang.CHN	K-436	G3	0.82	I
H123	XinJiang.CHN	K-437	G2	0.39	III
H124	XinJiang.CHN	K-438	G4	0.52	II
H125	XinJiang.CHN	LuTai-236G	G4	0.75	I
H126	XinJiang.CHN	LuTai-140G	G4	0.52	II
H127	XinJiang.CHN	LuTai-134G	G4	0.64	I
H128	XinJiang.CHN	LuTai-17G	G4	0.58	II
H129	XinJiang.CHN	CF-1	G4	0.91	I
H130	XinJiang.CHN	CF-11	G4	0.39	III
H131	XinJiang.CHN	CF-13	G2	0.4	III
H132	XinJiang.CHN	CF-14	G2	0.43	III
H133	XinJiang.CHN	CF-15	G4	0.51	III
H134	XinJiang.CHN	TH-293	G4	0.48	III
H135	XinJiang.CHN	TH-294	G4	0.5	III
H136	XinJiang.CHN	H166	G4	0.4	III
H137	XinJiang.CHN	H167	G2	0.34	IV
H138	XinJiang.CHN	H168	G2	0.41	III
H139	XinJiang.CHN	TC237	G2	0.4	III
H140	XinJiang.CHN	TC238	G2	0.41	III
H141	XinJiang.CHN	TC240	G2	0.3	IV
H142	XinJiang.CHN	16DJC01	G2	0.41	III
H143	XinJiang.CHN	16DJC02	G2	0.45	III
H144	XinJiang.CHN	MC145	G2	0.47	III
H145	XinJiang.CHN	MC296	G2	0.63	I
H146	XinJiang.CHN	MC475	G2	0.54	II
H147	XinJiang.CHN	MC193	G2	0.38	III
H148	XinJiang.CHN	YuanLong-26	G2	0.43	III
H149	XinJiang.CHN	YuanLong-27	G2	0.29	IV
H150	XinJiang.CHN	YuanLong-28	G2	0.61	II
H151	XinJiang.CHN	YuanLong-29	G4	0.55	II
H152	XinJiang.CHN	XinHai-41	G2	0.24	V
H153	XinJiang.CHN	C16-1	G4	0.21	V
H154	XinJiang.CHN	C16-4	G4	0.46	III
H155	XinJiang.CHN	C16-5	G4	0.35	IV
H156	XinJiang.CHN	C16-6	G4	0.28	V
H157	XinJiang.CHN	C16-11	G2	0.43	III
H158	XinJiang.CHN	CY15-1	G4	0.38	III
H159	XinJiang.CHN	CY15-16	G4	0.44	III
H160	XinJiang.CHN	MC-203	G2	0.83	I
H161	XinJiang.CHN	C16-15	G2	0.68	I
H162	XinJiang.CHN	C16-16	G2	0.48	III
H163	XinJiang.CHN	C16-17	G2	0.48	III
H164	XinJiang.CHN	YuanLong-22	G2	0.42	III
H165	XinJiang.CHN	C16-19	G2	0.37	IV
H166	XinJiang.CHN	C16-20	G3	0.54	II
H167	XinJiang.CHN	AW114	G3	0.5	III
H168	XinJiang.CHN	C16-23	G3	0.45	III
H169	XinJiang.CHN	AW117	G3	0.8	I
H170	XinJiang.CHN	15C1-8	G2	0.26	V
H171	XinJiang.CHN	C16-26	G2	0.34	IV
H172	XinJiang.CHN	C16-27	G4	0.55	II
H173	XinJiang.CHN	C16-28	G2	0.23	V
H174	XinJiang.CHN	33867	G4	0.57	II
H175	XinJiang.CHN	C16-32	G4	0.5	III
H176	XinJiang.CHN	C16-34	G4	0.46	III
H177	XinJiang.CHN	H33781	G4	0.42	III
H178	XinJiang.CHN	TH-421	G3	0.39	III
H179	XinJiang.CHN	C16-37	G4	0.2	V
H180	XinJiang.CHN	k-412	G4	0.38	III
H181	XinJiang.CHN	13ChangZa3-3	G3	0.35	IV
H182	XinJiang.CHN	13ChangZa5-3	G4	0.52	II
H183	XinJiang.CHN	14Y-13	G4	0.49	III
H184	XinJiang.CHN	CQ15-14	G4	0.42	III
H185	XinJiang.CHN	04F2-436	G3	0.56	II
H186	XinJiang.CHN	14X-4	G4	0.48	III
H187	XinJiang.CHN	15Y-13	G4	0.48	III
H188	XinJiang.CHN	15X-3	G4	0.42	III
H189	XinJiang.CHN	ChangSheng-2	G4	0.23	V
H190	XinJiang.CHN	S10-123	G4	0.45	III
H191	XinJiang.CHN	16C-602	G4	0.4	III
H192	XinJiang.CHN	S10-132	G4	0.29	IV
H193	XinJiang.CHN	16C-607	G2	0.34	IV
H194	XinJiang.CHN	JSH12-3	G4	0.49	III
H195	XinJiang.CHN	Ta09-63	G2	0.45	III
H196	XinJiang.CHN	Ta10-280	G4	0.43	III
H197	XinJiang.CHN	16C-648	G2	0.48	III
H198	XinJiang.CHN	16C-650	G3	0.44	III
H199	XinJiang.CHN	YuanLong-15	G4	0.27	V
H200	XinJiang.CHN	16C-653	G2	0.41	III
H201	XinJiang.CHN	16C-665	G4	0.47	III
H202	XinJiang.CHN	YuanLong-14	G2	0.49	III
H203	XinJiang.CHN	XinHai-76	G2	0.24	V
H204	XinJiang.CHN	16C-695	G3	0.38	III
H205	XinJiang.CHN	16C-707	G3	0.21	V
H206	XinJiang.CHN	16C-708	G4	0.32	IV
H207	XinJiang.CHN	16C-710	G4	0.28	V
H208	XinJiang.CHN	MCR3915	G4	0.54	II
H209	XinJiang.CHN	16C-717	G2	0.28	IV
H210	XinJiang.CHN	15DJC01	G2	0.41	III
H211	XinJiang.CHN	CF-2	G4	0.25	V
H212	XinJiang.CHN	16C-790	G2	0.34	IV
H213	XinJiang.CHN	16C-791	G4	0.35	IV
H214	XinJiang.CHN	16C-805	G2	0.43	III
H215	XinJiang.CHN	MC97-15	G4	0.41	III
H216	XinJiang.CHN	XinHai-35	G4	0.58	II
H217	XinJiang.CHN	XinHai-29	G2	0.35	IV
H218	XinJiang.CHN	XinHai-44	G2	0.59	II
H219	XinJiang.CHN	XinHai-45	G2	0.45	III
H220	XinJiang.CHN	YiDa cotton with low micronaire	G2	0.61	II
H221	America	Pima-S-3	G1	0.42	III
H222	America	SOVIN	G1	0.55	II
H223	America	BP101	G1	0.38	III
H224	America	Pima-S-1	G1	0.6	II
H225	America	AP-43	G1	0.4	III
H226	Egypt	Giza-7	G1	0.46	III
H227	Egypt	Giza-77	G1	0.45	III
H228	Egypt	Giza-67	G1	0.4	III
H229	Egypt	Giza-45	G1	0.42	III
H230	Egypt	Giza-30	G1	0.6	II
H231	Central Asia	107-7-1	G1	0.35	IV
H232	Central Asia	VIR-170V-4S	G1	0.43	III
H233	Central Asia	VIR-297V	G1	0.57	II
H234	Central Asia	4844-I	G1	0.35	IV
H235	Central Asia	6808B	G1	0.34	IV
H236	America	Pima-3-79	G1	0.61	II
H237	Egypt	Hai-7124	G1	0.52	II
H238	HaiNan.CHN	Core-linked-kapok	G1	0.36	IV
H239	Un-determined	Un-determined	G1	-	-
H240	YunNan.CHN	Core-free-kapok	G1	0.31	IV
