# Supplementary material for: Salt tolerance characterization and genome-wide association study of Gossypium barbadense accessions reveal salinity-adaptive variations
Source: Front Plant Sci. 2025 Sep 11;16:1654742. doi: 10.3389/fpls.2025.1654742 (PMC12460099; doi:10.3389/fpls.2025.1654742)
Supplement: Supplementary file 16 [file Table7.xlsx]

## Sheet: Sheet1
Supplementary Table 7. Summary of candidate genes within all QTLs.
Gene ID	Chromosme	Start (bp)	End (bp)	Arabidopsis thaliana ID
Gbar_A01G011830	Gbar_A01	32545490	32553715	AT1G09710
Gbar_A01G011840	Gbar_A01	32550769	32553477	AT1G58215
Gbar_A01G011850	Gbar_A01	32556395	32559845	-
Gbar_A01G015590	Gbar_A01	96512972	96515834	AT1G10740
Gbar_A02G006600	Gbar_A02	10873470	10880527	AT5G24080
Gbar_A02G006610	Gbar_A02	10882406	10885726	AT1G43670
Gbar_A02G006620	Gbar_A02	10975016	10982411	AT5G42140
Gbar_A02G006630	Gbar_A02	10984330	10985948	AT3G18710
Gbar_A02G006640	Gbar_A02	10999062	11001113	AT5G42120
Gbar_A02G006650	Gbar_A02	11001209	11004027	AT1G10830
Gbar_A02G008650	Gbar_A02	21951249	21954948	AT4G34110
Gbar_A02G009710	Gbar_A02	34705050	34743583	AT1G31480
Gbar_A02G009720	Gbar_A02	34754154	34759855	AT5G08420
Gbar_A02G012890	Gbar_A02	77604749	77605717	AT1G52140
Gbar_A02G012900	Gbar_A02	77609113	77617262	AT2G20000
Gbar_A02G012910	Gbar_A02	77657245	77660327	-
Gbar_A02G012920	Gbar_A02	77661194	77662134	AT1G79770
Gbar_A02G013090	Gbar_A02	79859876	79888631	AT3G53480
Gbar_A02G013100	Gbar_A02	79974118	79977019	AT1G52280
Gbar_A03G005740	Gbar_A03	9134129	9139708	AT1G07380
Gbar_A03G005750	Gbar_A03	9142529	9144349	AT2G29570
Gbar_A03G005760	Gbar_A03	9151756	9153495	AT4G37300
Gbar_A03G005770	Gbar_A03	9153732	9165896	AT3G46960
Gbar_A03G008210	Gbar_A03	18237250	18242012	AT2G33040
Gbar_A03G008220	Gbar_A03	18261388	18262020	-
Gbar_A03G008230	Gbar_A03	18267453	18270540	AT5G61030
Gbar_A03G008240	Gbar_A03	18327323	18329145	AT4G32640
Gbar_A03G008250	Gbar_A03	18362277	18365514	-
Gbar_A03G008260	Gbar_A03	18395220	18398647	AT5G08020
Gbar_A03G008270	Gbar_A03	18400685	18403151	AT5G08040
Gbar_A03G014890	Gbar_A03	87384296	87385886	AT1G24530
Gbar_A03G017270	Gbar_A03	97170986	97173125	AT4G28430
Gbar_A03G017280	Gbar_A03	97185645	97188358	AT5G36160
Gbar_A03G017290	Gbar_A03	97205546	97208104	AT5G36160
Gbar_A03G017300	Gbar_A03	97322972	97324547	AT5G44210
Gbar_A03G017310	Gbar_A03	97329324	97333415	AT5G53560
Gbar_A03G017320	Gbar_A03	97343127	97347900	AT1G03780
Gbar_A03G018760	Gbar_A03	100023501	100024568	-
Gbar_A03G018770	Gbar_A03	100039449	100042037	AT1G76490
Gbar_A03G018780	Gbar_A03	100105343	100107879	AT1G76490
Gbar_A03G018790	Gbar_A03	100164981	100173990	AT4G38200
Gbar_A03G018800	Gbar_A03	100183193	100184180	AT5G09315
Gbar_A03G018810	Gbar_A03	100186329	100187642	AT4G38213
Gbar_A03G018820	Gbar_A03	100189923	100192879	AT4G38220
Gbar_A03G018830	Gbar_A03	100193739	100196484	AT2G17350
Gbar_A03G018840	Gbar_A03	100197124	100197868	-
Gbar_A03G018850	Gbar_A03	100209311	100212623	AT4G35320
Gbar_A04G003890	Gbar_A04	9532907	9535793	AT3G05660
Gbar_A04G003900	Gbar_A04	9540947	9541774	AT3G14900
Gbar_A04G003910	Gbar_A04	9542656	9544914	AT3G58680
Gbar_A04G003920	Gbar_A04	9544967	9548909	AT1G53320
Gbar_A04G003930	Gbar_A04	9564251	9569773	AT2G26580
Gbar_A04G003940	Gbar_A04	9584955	9587198	-
Gbar_A04G003950	Gbar_A04	9674559	9698323	AT3G14470
Gbar_A04G003960	Gbar_A04	9713253	9714141	-
Gbar_A04G005010	Gbar_A04	14903413	14904000	-
Gbar_A04G005020	Gbar_A04	14938311	14941474	AT1G16060
Gbar_A04G006190	Gbar_A04	43273859	43275768	-
Gbar_A05G016260	Gbar_A05	15214015	15219306	AT1G61120
Gbar_A05G016270	Gbar_A05	15255072	15256450	AT1G12430
Gbar_A05G016280	Gbar_A05	15262483	15263277	-
Gbar_A05G016290	Gbar_A05	15267880	15273324	AT1G61120
Gbar_A05G016300	Gbar_A05	15291081	15300531	AT1G61140
Gbar_A05G016310	Gbar_A05	15317438	15321593	AT1G61150
Gbar_A05G016320	Gbar_A05	15320859	15321155	-
Gbar_A05G016330	Gbar_A05	15325086	15326240	-
Gbar_A05G016340	Gbar_A05	15329224	15332202	AT1G11120
Gbar_A05G016350	Gbar_A05	15333461	15334878	AT1G11125
Gbar_A05G016360	Gbar_A05	15338061	15341369	AT1G61215
Gbar_A05G016370	Gbar_A05	15346755	15353143	AT1G61240
Gbar_A05G016380	Gbar_A05	15356624	15362316	AT1G61250
Gbar_A05G016390	Gbar_A05	15361641	15362117	-
Gbar_A05G016400	Gbar_A05	15363532	15367680	AT5G66500
Gbar_A05G016410	Gbar_A05	15368490	15371779	AT5G18390
Gbar_A05G016420	Gbar_A05	15379598	15381328	-
Gbar_A05G016430	Gbar_A05	15379709	15386050	AT4G21585
Gbar_A05G027870	Gbar_A05	31074188	31075682	AT1G08315
Gbar_A05G027880	Gbar_A05	31081791	31084007	AT1G12710
Gbar_A05G027890	Gbar_A05	31086414	31086824	AT1G76560
Gbar_A05G027900	Gbar_A05	31101953	31105306	AT2G33560
Gbar_A05G027910	Gbar_A05	31108528	31109268	AT4G01400
Gbar_A05G027920	Gbar_A05	31224351	31224927	-
Gbar_A05G028690	Gbar_A05	33996441	33997775	AT3G25830
Gbar_A05G028700	Gbar_A05	34064217	34071512	AT4G16740
Gbar_A05G032410	Gbar_A05	64329363	64330249	-
Gbar_A05G032420	Gbar_A05	64337424	64338253	AT1G25400
Gbar_A05G032430	Gbar_A05	64393898	64396281	AT1G68450
Gbar_A05G032700	Gbar_A05	68313365	68315980	AT1G10522
Gbar_A05G032710	Gbar_A05	68315833	68317207	AT1G60010
Gbar_A05G033140	Gbar_A05	72087552	72099414	AT5G05570
Gbar_A05G033150	Gbar_A05	72100498	72101979	AT1G31160
Gbar_A06G008270	Gbar_A06	20080880	20087809	AT1G17370
Gbar_A06G008280	Gbar_A06	20086572	20087863	AT1G74940
Gbar_A06G011380	Gbar_A06	44909244	44911494	AT2G24430
Gbar_A06G011390	Gbar_A06	44936622	44939467	AT5G24800
Gbar_A06G011400	Gbar_A06	44936965	44937570	-
Gbar_A06G012370	Gbar_A06	61200579	61202446	AT1G52530
Gbar_A06G015840	Gbar_A06	103615322	103618135	AT1G61800
Gbar_A06G017000	Gbar_A06	106779660	106785454	AT1G02205
Gbar_A06G017010	Gbar_A06	106820138	106820668	AT2G37700
Gbar_A06G017020	Gbar_A06	106820714	106822156	AT1G02190
Gbar_A06G017030	Gbar_A06	106874238	106876863	AT1G65440
Gbar_A06G017040	Gbar_A06	106877214	106878073	-
Gbar_A07G002450	Gbar_A07	2679969	2685067	AT2G25930
Gbar_A07G002460	Gbar_A07	2689981	2690938	AT5G28010
Gbar_A07G002470	Gbar_A07	2700828	2702601	AT3G49690
Gbar_A07G002480	Gbar_A07	2726047	2727379	AT4G29190
Gbar_A07G002490	Gbar_A07	2744389	2747908	AT4G32915
Gbar_A07G002500	Gbar_A07	2748775	2758793	AT4G32820
Gbar_A07G002510	Gbar_A07	2759681	2762675	AT1G76480
Gbar_A07G002520	Gbar_A07	2772636	2772968	-
Gbar_A07G002530	Gbar_A07	2779187	2781669	AT4G32830
Gbar_A07G002540	Gbar_A07	2781640	2785230	AT4G26270
Gbar_A07G002550	Gbar_A07	2797319	2798454	AT2G19770
Gbar_A07G002560	Gbar_A07	2803160	2804681	AT1G79220
Gbar_A07G002570	Gbar_A07	2805139	2807079	AT5G25940
Gbar_A07G002580	Gbar_A07	2811331	2817877	AT2G25850
Gbar_A07G002590	Gbar_A07	2819313	2822906	AT5G25930
Gbar_A07G002600	Gbar_A07	2844032	2848608	AT2G25740
Gbar_A07G002610	Gbar_A07	2849088	2855705	AT5G25880
Gbar_A07G002620	Gbar_A07	2860064	2861893	-
Gbar_A07G002630	Gbar_A07	2861920	2867670	AT2G25760
Gbar_A07G002640	Gbar_A07	2869097	2869810	AT4G32870
Gbar_A07G002650	Gbar_A07	2870126	2872865	AT5G11650
Gbar_A07G002660	Gbar_A07	2874185	2875473	AT2G21430
Gbar_A07G002670	Gbar_A07	2886663	2890189	AT2G25790
Gbar_A07G002680	Gbar_A07	2898280	2905229	AT4G32880
Gbar_A07G002690	Gbar_A07	2921224	2924469	AT5G11580
Gbar_A07G002700	Gbar_A07	2924362	2927897	AT4G32810
Gbar_A07G002710	Gbar_A07	2948318	2950811	AT4G28940
Gbar_A07G002720	Gbar_A07	2956060	2961318	AT4G32770
Gbar_A07G002730	Gbar_A07	2963358	2964100	AT1G53540
Gbar_A07G002740	Gbar_A07	2992028	2996638	AT5G11540
Gbar_A07G002750	Gbar_A07	3000730	3007885	AT5G11530
Gbar_A07G012360	Gbar_A07	22338012	22340642	AT3G45260
Gbar_A07G014430	Gbar_A07	29375190	29388464	AT4G10840
Gbar_A07G014440	Gbar_A07	29422519	29425728	AT2G46550
Gbar_A07G014450	Gbar_A07	29426756	29428327	AT4G00950
Gbar_A07G014460	Gbar_A07	29429248	29434299	AT3G61830
Gbar_A07G014470	Gbar_A07	29487268	29491459	AT2G46520
Gbar_A07G014480	Gbar_A07	29506890	29509041	AT5G39160
Gbar_A07G014490	Gbar_A07	29510156	29512822	AT5G39160
Gbar_A07G014500	Gbar_A07	29519197	29521291	AT1G01300
Gbar_A07G014510	Gbar_A07	29524840	29528421	AT2G46500
Gbar_A07G014520	Gbar_A07	29538035	29546889	AT3G61770
Gbar_A07G017400	Gbar_A07	48847262	48854378	AT3G07620
Gbar_A07G017410	Gbar_A07	49000647	49003598	AT4G26550
Gbar_A07G017420	Gbar_A07	49007300	49007931	-
Gbar_A07G017470	Gbar_A07	50547720	50547896	ATCG00360
Gbar_A07G017480	Gbar_A07	50555055	50556518	ATCG00490
Gbar_A07G017490	Gbar_A07	50632381	50636997	AT3G07670
Gbar_A07G017500	Gbar_A07	50781488	50785836	AT5G48220
Gbar_A07G017530	Gbar_A07	51791477	51795678	AT1G05000
Gbar_A07G017560	Gbar_A07	52256070	52258354	AT5G14180
Gbar_A07G017570	Gbar_A07	52479728	52483357	-
Gbar_A07G017630	Gbar_A07	53257965	53261438	-
Gbar_A07G017640	Gbar_A07	53261566	53262422	-
Gbar_A07G017650	Gbar_A07	53265639	53268065	-
Gbar_A07G017660	Gbar_A07	53268068	53270309	-
Gbar_A07G017670	Gbar_A07	53281328	53299717	AT1G65950
Gbar_A07G017680	Gbar_A07	53349144	53349897	AT1G66140
Gbar_A07G017690	Gbar_A07	53449684	53451870	AT3G12700
Gbar_A07G017700	Gbar_A07	53475481	53480191	AT5G15790
Gbar_A07G017710	Gbar_A07	53598193	53602931	AT5G37510
Gbar_A07G017720	Gbar_A07	53758469	53760270	AT5G38480
Gbar_A07G017730	Gbar_A07	53856389	53861280	AT1G10580
Gbar_A07G017740	Gbar_A07	53930835	53940505	AT3G19130
Gbar_A07G017750	Gbar_A07	53940949	53941944	-
Gbar_A07G017760	Gbar_A07	54172454	54176729	-
Gbar_A07G017770	Gbar_A07	54177333	54181025	AT2G32520
Gbar_A07G017780	Gbar_A07	54845507	54846795	AT2G05100
Gbar_A07G017790	Gbar_A07	55576102	55579100	AT5G38480
Gbar_A07G017800	Gbar_A07	55726554	55728183	AT1G14900
Gbar_A07G017810	Gbar_A07	55808039	55809490	-
Gbar_A07G017820	Gbar_A07	56866523	56870336	AT5G16720
Gbar_A07G017840	Gbar_A07	58687363	58688262	-
Gbar_A07G017850	Gbar_A07	58912796	58914876	AT2G04780
Gbar_A07G017860	Gbar_A07	59032646	59034964	-
Gbar_A07G017870	Gbar_A07	59035035	59035749	-
Gbar_A07G017880	Gbar_A07	59262235	59264167	AT3G07870
Gbar_A07G017890	Gbar_A07	59725071	59725406	AT5G35732
Gbar_A07G017900	Gbar_A07	60003127	60004709	AT3G14040
Gbar_A07G017910	Gbar_A07	60006614	60010029	AT2G04842
Gbar_A07G017920	Gbar_A07	60011672	60013224	AT5G35735
Gbar_A07G017930	Gbar_A07	60089084	60089278	-
Gbar_A07G017940	Gbar_A07	60216256	60218881	AT2G04845
Gbar_A07G017950	Gbar_A07	60227286	60232448	AT3G07810
Gbar_A07G017960	Gbar_A07	60298972	60303302	AT2G04865
Gbar_A07G017970	Gbar_A07	60305679	60308680	AT2G04880
Gbar_A07G017980	Gbar_A07	60308659	60311675	AT5G48150
Gbar_A07G017990	Gbar_A07	60639626	60642303	AT2G04900
Gbar_A07G018000	Gbar_A07	60644601	60645724	AT5G35740
Gbar_A07G018010	Gbar_A07	60646411	60646827	-
Gbar_A07G018020	Gbar_A07	60647183	60654851	AT5G35750
Gbar_A07G018030	Gbar_A07	60889921	60894994	AT3G21610
Gbar_A07G018040	Gbar_A07	60995659	60997390	AT3G49010
Gbar_A07G018050	Gbar_A07	61134970	61136003	AT3G61110
Gbar_A07G018060	Gbar_A07	61259005	61266781	AT5G37310
Gbar_A07G018070	Gbar_A07	62013680	62016602	AT1G48480
Gbar_A07G018080	Gbar_A07	62087501	62091701	AT5G19620
Gbar_A07G018090	Gbar_A07	62103336	62117659	AT5G01660
Gbar_A07G018100	Gbar_A07	62238726	62241187	AT3G22150
Gbar_A07G018110	Gbar_A07	62710317	62711220	-
Gbar_A07G018120	Gbar_A07	62718630	62720969	AT4G35090
Gbar_A07G018130	Gbar_A07	62720870	62725531	AT3G06540
Gbar_A07G018140	Gbar_A07	62766518	62768468	AT2G17560
Gbar_A07G018150	Gbar_A07	62796700	62799354	AT5G66005
Gbar_A07G018160	Gbar_A07	62803194	62808296	AT2G17550
Gbar_A07G018170	Gbar_A07	62829386	62832202	AT4G35550
Gbar_A07G018180	Gbar_A07	62959476	62975520	-
Gbar_A07G018190	Gbar_A07	63097333	63099519	AT4G35510
Gbar_A07G018200	Gbar_A07	63605792	63608008	AT2G17630
Gbar_A07G018210	Gbar_A07	63608486	63613561	AT2G17580
Gbar_A07G018220	Gbar_A07	63642404	63645446	AT3G07760
Gbar_A07G018230	Gbar_A07	63675776	63680131	AT5G37450
Gbar_A07G018240	Gbar_A07	63683046	63683726	-
Gbar_A07G018250	Gbar_A07	64993969	65001710	AT3G07700
Gbar_A07G018260	Gbar_A07	65003115	65003573	-
Gbar_A07G018270	Gbar_A07	65455634	65455969	-
Gbar_A07G018280	Gbar_A07	65531172	65536456	AT1G04980
Gbar_A07G018290	Gbar_A07	65589449	65594985	-
Gbar_A07G018300	Gbar_A07	65723567	65734241	AT2G32900
Gbar_A07G018310	Gbar_A07	66161063	66164924	AT3G07890
Gbar_A07G018320	Gbar_A07	67323934	67324632	AT2G44310
Gbar_A07G018330	Gbar_A07	68337128	68351441	-
Gbar_A07G018340	Gbar_A07	68687134	68689917	AT1G67260
Gbar_A07G018350	Gbar_A07	68707152	68709616	-
Gbar_A07G018360	Gbar_A07	68851417	68862959	AT5G63870
Gbar_A07G018370	Gbar_A07	68911396	68917098	AT5G65950
Gbar_A07G018380	Gbar_A07	69112762	69128064	-
Gbar_A07G018390	Gbar_A07	70078935	70082778	AT4G35470
Gbar_A07G018400	Gbar_A07	70083504	70090112	AT2G17480
Gbar_A07G018410	Gbar_A07	70616881	70620697	AT2G05250
Gbar_A07G018420	Gbar_A07	70804487	70806350	-
Gbar_A07G018430	Gbar_A07	71194299	71198508	AT5G35770
Gbar_A07G018440	Gbar_A07	71269287	71269919	-
Gbar_A07G018450	Gbar_A07	71429240	71431288	AT1G08070
Gbar_A07G018460	Gbar_A07	71429496	71432826	AT2G05100
Gbar_A07G018470	Gbar_A07	71641516	71650537	AT1G67230
Gbar_A07G018480	Gbar_A07	72194782	72194943	-
Gbar_A07G018490	Gbar_A07	72668151	72670646	AT4G02750
Gbar_A07G018500	Gbar_A07	72956570	72960826	AT1G63640
Gbar_A07G018510	Gbar_A07	73056621	73060980	AT5G13240
Gbar_A07G018520	Gbar_A07	73087068	73098990	AT5G16620
Gbar_A07G018530	Gbar_A07	73308613	73317523	AT5G16210
Gbar_A07G018540	Gbar_A07	73568149	73568439	AT3G18280
Gbar_A07G018550	Gbar_A07	73635824	73642621	AT5G38220
Gbar_A07G018560	Gbar_A07	73687042	73690812	AT5G38290
Gbar_A07G018570	Gbar_A07	73691985	73692649	-
Gbar_A07G018580	Gbar_A07	73695825	73700901	AT2G44040
Gbar_A07G018590	Gbar_A07	73811834	73813611	-
Gbar_A07G018600	Gbar_A07	73902169	73904608	AT5G16110
Gbar_A07G018610	Gbar_A07	73911448	73912836	AT5G38430
Gbar_A07G018620	Gbar_A07	74085438	74085962	-
Gbar_A07G018630	Gbar_A07	74284871	74287584	AT1G66840
Gbar_A07G018640	Gbar_A07	74436640	74437334	-
Gbar_A07G018650	Gbar_A07	74471195	74474808	AT2G01275
Gbar_A07G018660	Gbar_A07	75275295	75278304	AT5G37600
Gbar_A07G018670	Gbar_A07	75278483	75281569	AT1G47890
Gbar_A07G018680	Gbar_A07	75321983	75324787	AT3G02420
Gbar_A07G018690	Gbar_A07	75352538	75357063	AT3G02450
Gbar_A07G018700	Gbar_A07	75359921	75363038	AT5G38710
Gbar_A07G018710	Gbar_A07	75416247	75419154	AT1G48480
Gbar_A07G018720	Gbar_A07	75437331	75438231	AT1G78380
Gbar_A07G018730	Gbar_A07	75542836	75548656	AT5G37510
Gbar_A07G018740	Gbar_A07	75549189	75551765	AT1G65820
Gbar_A07G018750	Gbar_A07	75592651	75605540	AT5G37020
Gbar_A07G018760	Gbar_A07	75680950	75681531	AT5G63320
Gbar_A07G018770	Gbar_A07	75681661	75688904	AT5G17070
Gbar_A07G018780	Gbar_A07	75690173	75695832	AT3G26618
Gbar_A07G018790	Gbar_A07	75713439	75716329	AT5G37710
Gbar_A07G018800	Gbar_A07	75864898	75869065	AT1G66250
Gbar_A07G018810	Gbar_A07	75933455	75935549	AT3G07970
Gbar_A07G018820	Gbar_A07	75965305	75965849	-
Gbar_A07G018830	Gbar_A07	75976926	75980629	AT3G30390
Gbar_A07G018840	Gbar_A07	76007656	76009239	AT2G38940
Gbar_A07G018850	Gbar_A07	76119454	76120822	AT3G30530
Gbar_A07G018860	Gbar_A07	76186855	76189624	AT3G02350
Gbar_A07G018870	Gbar_A07	76192963	76195989	AT3G02360
Gbar_A07G018880	Gbar_A07	76205960	76207972	AT2G24762
Gbar_A08G007040	Gbar_A08	10998805	11004291	AT4G14713
Gbar_A08G007050	Gbar_A08	11042117	11050412	AT3G18670
Gbar_A08G007060	Gbar_A08	11087171	11095939	-
Gbar_A08G007070	Gbar_A08	11143424	11145891	AT1G03070
Gbar_A08G007080	Gbar_A08	11146287	11149116	AT3G63300
Gbar_A08G007090	Gbar_A08	11156100	11162544	AT3G63280
Gbar_A08G007100	Gbar_A08	11164284	11175296	AT1G03080
Gbar_A08G008520	Gbar_A08	19364183	19366008	AT1G55260
Gbar_A08G008530	Gbar_A08	19518998	19521699	AT5G19860
Gbar_A08G009030	Gbar_A08	26422519	26425704	AT2G18910
Gbar_A08G012560	Gbar_A08	84141695	84142217	-
Gbar_A08G012570	Gbar_A08	84218517	84232875	AT1G15520
Gbar_A09G004330	Gbar_A09	16467795	16468305	-
Gbar_A09G010380	Gbar_A09	58544725	58545807	AT3G44735
Gbar_A09G010390	Gbar_A09	58627259	58629110	AT1G08250
Gbar_A10G008370	Gbar_A10	12142580	12143704	AT1G52820
Gbar_A10G008380	Gbar_A10	12180664	12182515	AT1G15550
Gbar_A10G008390	Gbar_A10	12214527	12222078	AT1G80370
Gbar_A10G008400	Gbar_A10	12245591	12251121	AT1G80400
Gbar_A10G008410	Gbar_A10	12251566	12264898	AT1G80410
Gbar_A10G008420	Gbar_A10	12287546	12297958	AT1G15660
Gbar_A10G008430	Gbar_A10	12313251	12314324	AT1G80440
Gbar_A10G010850	Gbar_A10	21005861	21006915	AT5G05800
Gbar_A10G010860	Gbar_A10	21016652	21017627	AT5G04800
Gbar_A10G010870	Gbar_A10	21020476	21020802	AT5G40460
Gbar_A10G010880	Gbar_A10	21034130	21037889	AT5G47750
Gbar_A10G010890	Gbar_A10	21040110	21045230	AT3G27470
Gbar_A10G010900	Gbar_A10	21046803	21049725	AT5G14450
Gbar_A10G010910	Gbar_A10	21060944	21062416	AT5G14450
Gbar_A10G010920	Gbar_A10	21072006	21073662	-
Gbar_A10G010930	Gbar_A10	21075070	21078221	AT1G02680
Gbar_A10G010940	Gbar_A10	21079347	21081505	AT5G40570
Gbar_A10G010950	Gbar_A10	21082520	21086854	AT4G35850
Gbar_A10G010960	Gbar_A10	21087298	21091510	AT4G35860
Gbar_A10G010970	Gbar_A10	21163978	21165521	-
Gbar_A10G011230	Gbar_A10	22746652	22748596	AT5G18790
Gbar_A10G011240	Gbar_A10	22748710	22750581	AT5G18800
Gbar_A10G014760	Gbar_A10	71866345	71867489	AT3G59400
Gbar_A10G014770	Gbar_A10	71872782	71875387	AT1G05970
Gbar_A10G014780	Gbar_A10	71875816	71899039	AT3G59410
Gbar_A10G014790	Gbar_A10	71899228	71902926	AT3G59420
Gbar_A10G014800	Gbar_A10	71914181	71922081	AT3G59430
Gbar_A10G014810	Gbar_A10	71923085	71925947	AT3G57880
Gbar_A10G014820	Gbar_A10	71940882	71943115	-
Gbar_A10G014830	Gbar_A10	71998361	71999745	AT2G43290
Gbar_A10G014840	Gbar_A10	72000919	72004020	AT3G07500
Gbar_A10G014850	Gbar_A10	72038677	72041939	AT2G43280
Gbar_A10G023540	Gbar_A10	106694119	106697996	AT3G55440
Gbar_A10G023550	Gbar_A10	106700976	106704296	AT1G20920
Gbar_A10G023560	Gbar_A10	106704507	106706999	-
Gbar_A10G023570	Gbar_A10	106715413	106718642	AT1G07570
Gbar_A10G023580	Gbar_A10	106718949	106722655	AT3G55460
Gbar_A10G023590	Gbar_A10	106724944	106727704	AT3G55470
Gbar_A10G023600	Gbar_A10	106730088	106736257	-
Gbar_A10G023610	Gbar_A10	106747916	106765644	AT4G27190
Gbar_A10G023620	Gbar_A10	106768510	106774458	-
Gbar_A10G023630	Gbar_A10	106776104	106777248	-
Gbar_A10G023640	Gbar_A10	106796497	106798253	AT1G15910
Gbar_A10G023650	Gbar_A10	106804152	106805774	AT4G27190
Gbar_A10G023660	Gbar_A10	106814821	106835508	AT4G27190
Gbar_A10G023670	Gbar_A10	106848646	106849940	AT1G61190
Gbar_A10G023680	Gbar_A10	106851441	106858546	-
Gbar_A10G023690	Gbar_A10	106866468	106867383	-
Gbar_A10G023700	Gbar_A10	106872969	106874773	AT2G39700
Gbar_A10G025700	Gbar_A10	110007081	110009952	AT2G40430
Gbar_A10G025710	Gbar_A10	110011985	110012185	-
Gbar_A10G025720	Gbar_A10	110012643	110015267	AT2G38780
Gbar_A10G025730	Gbar_A10	110016024	110020653	AT2G16530
Gbar_A10G025740	Gbar_A10	110022774	110025237	AT2G38800
Gbar_A10G025750	Gbar_A10	110026046	110027517	AT1G29050
Gbar_A10G025760	Gbar_A10	110027463	110036093	AT4G27220
Gbar_A10G025770	Gbar_A10	110044959	110046131	AT4G23160
Gbar_A10G025780	Gbar_A10	110058192	110067918	AT4G27190
Gbar_A10G025790	Gbar_A10	110076863	110078229	AT1G29050
Gbar_A10G025800	Gbar_A10	110104480	110106892	AT1G61180
Gbar_A10G025810	Gbar_A10	110121265	110148465	AT4G27190
Gbar_A10G025820	Gbar_A10	110180977	110182608	AT3G51930
Gbar_A10G025830	Gbar_A10	110183032	110185306	AT3G51940
Gbar_A10G025840	Gbar_A10	110186259	110187575	AT1G74120
Gbar_A10G025850	Gbar_A10	110188263	110193726	AT1G30610
Gbar_A10G025860	Gbar_A10	110197430	110199625	AT5G13460
Gbar_A11G023170	Gbar_A11	69506297	69510619	AT5G64630
Gbar_A12G009010	Gbar_A12	45832594	45835019	AT4G37990
Gbar_A12G009020	Gbar_A12	45852361	45854088	AT4G37980
Gbar_A12G010140	Gbar_A12	67314670	67320159	AT5G10080
Gbar_A12G010150	Gbar_A12	67441644	67442744	-
Gbar_A12G016090	Gbar_A12	84542699	84546682	AT1G67510
Gbar_A12G016100	Gbar_A12	84547919	84549039	-
Gbar_A12G016110	Gbar_A12	84550737	84552385	AT1G67480
Gbar_A12G016120	Gbar_A12	84559438	84561152	AT4G40042
Gbar_A12G016130	Gbar_A12	84564384	84566938	AT1G67340
Gbar_A12G016140	Gbar_A12	84606487	84608424	AT3G61470
Gbar_A12G016150	Gbar_A12	84609468	84610373	AT5G43260
Gbar_A12G017190	Gbar_A12	87540585	87542805	AT3G54450
Gbar_A12G017200	Gbar_A12	87543093	87546230	AT4G30000
Gbar_A12G017210	Gbar_A12	87547222	87551290	AT1G69200
Gbar_A12G017220	Gbar_A12	87551091	87560063	AT1G69220
Gbar_A12G017230	Gbar_A12	87587132	87589579	AT1G13710
Gbar_A12G017240	Gbar_A12	87601355	87608936	AT1G26370
Gbar_A12G017250	Gbar_A12	87617273	87622096	AT2G03667
Gbar_A12G017260	Gbar_A12	87630240	87632747	AT1G13740
Gbar_A12G017270	Gbar_A12	87632860	87637028	AT3G02130
Gbar_A12G017280	Gbar_A12	87641852	87645924	-
Gbar_A12G017290	Gbar_A12	87645958	87647412	-
Gbar_A12G017300	Gbar_A12	87657228	87660480	AT2G03620
Gbar_A12G017310	Gbar_A12	87660728	87665158	AT1G13750
Gbar_A12G017320	Gbar_A12	87689625	87694439	AT1G13770
Gbar_A12G017330	Gbar_A12	87709337	87713005	AT1G13820
Gbar_A12G017340	Gbar_A12	87734397	87737731	AT1G48620
Gbar_A12G017350	Gbar_A12	87752353	87754126	AT1G18650
Gbar_A12G017360	Gbar_A12	87758397	87759954	AT1G26460
Gbar_A12G017370	Gbar_A12	87809796	87813233	AT2G03480
Gbar_A12G017380	Gbar_A12	87815780	87817582	AT1G26560
Gbar_A13G003370	Gbar_A13	3981263	3986839	AT2G16250
Gbar_A13G003380	Gbar_A13	3987789	3991026	AT2G21710
Gbar_A13G003390	Gbar_A13	3991123	3993806	AT1G16700
Gbar_A13G003400	Gbar_A13	3997265	4001440	AT1G19400
Gbar_A13G003410	Gbar_A13	4003251	4006410	AT1G63850
Gbar_A13G003420	Gbar_A13	4020581	4021694	-
Gbar_A13G003430	Gbar_A13	4023223	4027838	AT4G34490
Gbar_A13G003440	Gbar_A13	4030716	4034465	AT4G34460
Gbar_A13G003450	Gbar_A13	4034383	4040321	AT4G34450
Gbar_A13G003460	Gbar_A13	4042541	4047023	AT4G34440
Gbar_A13G003470	Gbar_A13	4050234	4053037	AT3G18820
Gbar_A13G003480	Gbar_A13	4054635	4056018	AT1G71180
Gbar_A13G003490	Gbar_A13	4057125	4060591	AT1G71190
Gbar_A13G003500	Gbar_A13	4063434	4066757	AT1G71200
Gbar_A13G003510	Gbar_A13	4076283	4078459	AT1G14020
Gbar_A13G003520	Gbar_A13	4088182	4097629	AT4G22200
Gbar_A13G003530	Gbar_A13	4111853	4114687	AT1G22030
Gbar_A13G003540	Gbar_A13	4131336	4137759	AT1G22930
Gbar_A13G003550	Gbar_A13	4137759	4147590	AT1G10930
Gbar_A13G003560	Gbar_A13	4157453	4161345	AT1G22940
Gbar_A13G003570	Gbar_A13	4161300	4165100	AT1G60940
Gbar_A13G008420	Gbar_A13	31146278	31148588	AT2G03530
Gbar_A13G010740	Gbar_A13	59546082	59548317	AT3G30530
Gbar_A13G014490	Gbar_A13	90679626	90687099	AT1G55840
Gbar_A13G014500	Gbar_A13	90684726	90686745	AT5G55860
Gbar_A13G014510	Gbar_A13	90738309	90741953	AT2G36000
Gbar_A13G014520	Gbar_A13	90744084	90746740	AT5G55850
Gbar_A13G018170	Gbar_A13	100789886	100790807	-
Gbar_A13G018180	Gbar_A13	100794579	100795159	-
Gbar_A13G018190	Gbar_A13	100819174	100820187	AT2G20340
Gbar_A13G018200	Gbar_A13	100830433	100831620	AT5G39110
Gbar_A13G018210	Gbar_A13	100896054	100897514	AT2G20340
Gbar_A13G018220	Gbar_A13	100944516	100964586	AT3G05950
Gbar_A13G018230	Gbar_A13	100964958	100966418	AT2G20340
Gbar_A13G019390	Gbar_A13	102800128	102801491	AT3G24130
Gbar_A13G019400	Gbar_A13	102837971	102838627	AT1G09250
Gbar_A13G019410	Gbar_A13	102845064	102846156	AT1G09310
Gbar_A13G019420	Gbar_A13	102846705	102851881	AT1G09320
Gbar_A13G019430	Gbar_A13	102854322	102857661	AT1G56560
Gbar_A13G019440	Gbar_A13	102876496	102877913	AT4G15510
Gbar_A13G019450	Gbar_A13	102877859	102880764	AT1G56590
Gbar_A13G019460	Gbar_A13	102884596	102886178	AT1G56600
Gbar_A13G019470	Gbar_A13	102886672	102890794	AT1G10630
Gbar_A13G019480	Gbar_A13	102890954	102893555	AT1G09380
Gbar_D01G004410	Gbar_D01	5220310	5224524	AT1G53400
Gbar_D01G004420	Gbar_D01	5224625	5229535	AT1G78650
Gbar_D01G004430	Gbar_D01	5245814	5250962	AT1G78680
Gbar_D01G004440	Gbar_D01	5299756	5304863	AT1G78680
Gbar_D01G004450	Gbar_D01	5308087	5313125	AT3G47570
Gbar_D01G004460	Gbar_D01	5361163	5365857	AT5G46330
Gbar_D01G013270	Gbar_D01	28117400	28121080	AT2G41900
Gbar_D01G013280	Gbar_D01	28225169	28228956	AT2G41900
Gbar_D01G013320	Gbar_D01	28725056	28725446	-
Gbar_D01G013330	Gbar_D01	28734428	28735161	-
Gbar_D01G013340	Gbar_D01	28735474	28736539	-
Gbar_D01G013350	Gbar_D01	28743640	28743843	-
Gbar_D01G013360	Gbar_D01	28767488	28770555	AT3G12170
Gbar_D01G013840	Gbar_D01	31963961	31964761	AT3G11550
Gbar_D01G013850	Gbar_D01	32007855	32008655	AT5G06200
Gbar_D01G013860	Gbar_D01	32041811	32042011	-
Gbar_D01G015010	Gbar_D01	41664315	41668508	AT1G14600
Gbar_D01G015020	Gbar_D01	41768485	41779319	AT1G75010
Gbar_D01G015350	Gbar_D01	43266506	43269105	AT1G70650
Gbar_D01G015360	Gbar_D01	43285575	43304011	-
Gbar_D01G015370	Gbar_D01	43363364	43373029	AT5G67150
Gbar_D02G004860	Gbar_D02	6230237	6232264	AT1G04540
Gbar_D02G004870	Gbar_D02	6276508	6278216	AT4G13450
Gbar_D02G004880	Gbar_D02	6279630	6282103	AT3G24315
Gbar_D02G004890	Gbar_D02	6285664	6287067	AT2G44800
Gbar_D02G004900	Gbar_D02	6329040	6330818	AT2G44800
Gbar_D02G004910	Gbar_D02	6375536	6378661	AT4G08850
Gbar_D02G004920	Gbar_D02	6381050	6381675	AT4G36810
Gbar_D02G004930	Gbar_D02	6410689	6411704	AT4G13480
Gbar_D02G004940	Gbar_D02	6419697	6423887	AT3G12770
Gbar_D02G004950	Gbar_D02	6422493	6426358	AT2G33280
Gbar_D02G013440	Gbar_D02	41437259	41441167	AT1G69610
Gbar_D02G013450	Gbar_D02	41454014	41454250	-
Gbar_D02G013460	Gbar_D02	41491316	41493138	AT1G69600
Gbar_D02G014430	Gbar_D02	45137468	45138860	AT3G19800
Gbar_D02G014440	Gbar_D02	45190411	45195453	AT2G37790
Gbar_D02G014450	Gbar_D02	45199754	45203524	AT2G02220
Gbar_D02G014460	Gbar_D02	45237919	45238323	-
Gbar_D02G014470	Gbar_D02	45265756	45268044	AT5G60390
Gbar_D02G014570	Gbar_D02	45594807	45605799	AT1G14780
Gbar_D02G014580	Gbar_D02	45627388	45632059	AT1G68020
Gbar_D02G014590	Gbar_D02	45734781	45740874	AT1G16020
Gbar_D02G014600	Gbar_D02	45794473	45797311	AT2G01818
Gbar_D02G014610	Gbar_D02	45804824	45825027	AT1G24706
Gbar_D02G014620	Gbar_D02	45936209	45949437	-
Gbar_D02G014630	Gbar_D02	45988597	45992723	-
Gbar_D02G014640	Gbar_D02	46087416	46089185	AT5G37490
Gbar_D02G014650	Gbar_D02	46114811	46124984	AT2G01830
Gbar_D02G014660	Gbar_D02	46206936	46208070	AT4G25570
Gbar_D02G014670	Gbar_D02	46250365	46253357	AT1G14720
Gbar_D02G014680	Gbar_D02	46257068	46260234	AT1G25220
Gbar_D02G014690	Gbar_D02	46282118	46283300	-
Gbar_D02G014700	Gbar_D02	46367745	46374817	AT1G14710
Gbar_D02G014710	Gbar_D02	46387236	46387718	AT1G60620
Gbar_D02G014720	Gbar_D02	46407891	46410431	AT4G24820
Gbar_D02G014730	Gbar_D02	46410967	46411947	AT4G23160
Gbar_D02G016550	Gbar_D02	53914059	53922525	AT1G24460
Gbar_D02G016560	Gbar_D02	53992088	53993216	-
Gbar_D02G016570	Gbar_D02	54005384	54006891	-
Gbar_D02G016580	Gbar_D02	54026151	54032588	AT3G26090
Gbar_D02G016590	Gbar_D02	54066967	54074295	AT1G24470
Gbar_D04G009180	Gbar_D04	19572216	19572680	-
Gbar_D05G017060	Gbar_D05	14798720	14799325	-
Gbar_D05G017070	Gbar_D05	14809820	14814002	AT4G05150
Gbar_D05G017080	Gbar_D05	14823673	14825741	AT4G03270
Gbar_D05G017090	Gbar_D05	14828274	14831303	AT1G11380
Gbar_D05G017100	Gbar_D05	14838605	14839123	AT4G27280
Gbar_D05G017110	Gbar_D05	14842210	14845592	AT4G27290
Gbar_D05G017120	Gbar_D05	14855690	14858749	AT1G61660
Gbar_D05G017130	Gbar_D05	14869514	14870350	-
Gbar_D05G017140	Gbar_D05	14870451	14872919	AT3G22104
Gbar_D05G017150	Gbar_D05	14883479	14886457	AT1G61720
Gbar_D05G017160	Gbar_D05	14899027	14901380	AT4G27240
Gbar_D05G017170	Gbar_D05	14901504	14903235	AT4G05180
Gbar_D05G017180	Gbar_D05	14903587	14908753	AT4G21270
Gbar_D05G017190	Gbar_D05	14909117	14910898	AT1G11530
Gbar_D05G017200	Gbar_D05	14911359	14913450	AT5G54680
Gbar_D05G017210	Gbar_D05	14913574	14915987	AT1G61740
Gbar_D05G017220	Gbar_D05	14918245	14921378	AT4G05200
Gbar_D05G017230	Gbar_D05	14927965	14929143	AT4G23160
Gbar_D05G017240	Gbar_D05	14929410	14933405	AT4G21200
Gbar_D05G017250	Gbar_D05	14958211	14959838	AT5G54770
Gbar_D05G017260	Gbar_D05	14961541	14963582	AT4G21170
Gbar_D05G017270	Gbar_D05	14963632	14969528	AT1G61790
Gbar_D05G017280	Gbar_D05	14971664	14972118	AT1G11570
Gbar_D05G017290	Gbar_D05	14973846	14975585	AT1G11580
Gbar_D05G017300	Gbar_D05	14976552	14978797	AT4G04900
Gbar_D05G017310	Gbar_D05	14979183	14983104	AT4G21770
Gbar_D05G017320	Gbar_D05	14983321	14990422	AT1G61850
Gbar_D05G017330	Gbar_D05	14991886	14993824	-
Gbar_D05G032590	Gbar_D05	41849895	41850245	-
Gbar_D05G032600	Gbar_D05	41869712	41871536	-
Gbar_D05G032610	Gbar_D05	41884799	41889034	-
Gbar_D05G032620	Gbar_D05	41916336	41918215	-
Gbar_D05G032630	Gbar_D05	41919985	41920335	-
Gbar_D05G032640	Gbar_D05	41923991	41924341	-
Gbar_D05G033390	Gbar_D05	45081199	45081573	-
Gbar_D05G033400	Gbar_D05	45176732	45177408	-
Gbar_D05G038060	Gbar_D05	61190534	61193853	AT4G27020
Gbar_D05G038070	Gbar_D05	61197214	61199281	AT3G20510
Gbar_D05G038080	Gbar_D05	61199870	61201360	AT5G54880
Gbar_D05G038090	Gbar_D05	61201824	61203822	AT5G54890
Gbar_D05G038100	Gbar_D05	61214552	61217942	AT3G47570
Gbar_D05G038110	Gbar_D05	61228738	61229392	-
Gbar_D05G038120	Gbar_D05	61254664	61261920	AT4G27190
Gbar_D05G038130	Gbar_D05	61282557	61283489	-
Gbar_D05G038140	Gbar_D05	61302308	61304374	AT5G54890
Gbar_D05G038150	Gbar_D05	61368270	61371753	AT3G47570
Gbar_D05G038160	Gbar_D05	61377189	61382723	AT4G27220
Gbar_D06G005890	Gbar_D06	8209577	8213144	AT2G26670
Gbar_D06G005900	Gbar_D06	8228701	8231756	AT3G47650
Gbar_D06G005910	Gbar_D06	8231910	8234206	-
Gbar_D06G005920	Gbar_D06	8234230	8234519	-
Gbar_D06G005930	Gbar_D06	8234558	8236628	AT2G26680
Gbar_D06G005940	Gbar_D06	8241606	8243859	AT1G80140
Gbar_D06G005950	Gbar_D06	8243910	8246131	AT2G26690
Gbar_D06G005960	Gbar_D06	8266943	8269713	AT5G62700
Gbar_D06G005970	Gbar_D06	8289253	8292435	AT1G11310
Gbar_D06G005980	Gbar_D06	8303913	8307991	AT2G26690
Gbar_D06G005990	Gbar_D06	8371351	8373586	AT5G20160
Gbar_D06G006000	Gbar_D06	8379947	8383495	AT1G52600
Gbar_D06G006010	Gbar_D06	8385233	8387400	AT2G34160
Gbar_D06G009730	Gbar_D06	18769237	18769662	-
Gbar_D06G009740	Gbar_D06	18783823	18784107	-
Gbar_D06G009750	Gbar_D06	18788292	18789388	-
Gbar_D06G009760	Gbar_D06	18790771	18794506	AT4G32520
Gbar_D06G009770	Gbar_D06	18796265	18797639	-
Gbar_D06G009780	Gbar_D06	18805107	18808502	AT2G25950
Gbar_D06G009790	Gbar_D06	18858479	18861339	AT5G26010
Gbar_D06G009800	Gbar_D06	18863152	18866967	AT4G32940
Gbar_D06G014950	Gbar_D06	46461401	46465727	AT5G45750
Gbar_D06G014960	Gbar_D06	46538364	46539051	AT2G45620
Gbar_D06G014970	Gbar_D06	46541840	46542716	-
Gbar_D06G014980	Gbar_D06	46547025	46553483	AT4G18810
Gbar_D06G019360	Gbar_D06	58149780	58156418	AT3G03770
Gbar_D06G019370	Gbar_D06	58155792	58158963	AT3G56030
Gbar_D06G019380	Gbar_D06	58160687	58176451	AT1G17760
Gbar_D06G019390	Gbar_D06	58177711	58184486	AT3G10660
Gbar_D06G019400	Gbar_D06	58219403	58223872	AT5G04910
Gbar_D06G019410	Gbar_D06	58253757	58254842	AT4G12560
Gbar_D06G019420	Gbar_D06	58257905	58263518	AT3G54360
Gbar_D06G019430	Gbar_D06	58265238	58269644	AT2G19280
Gbar_D06G019440	Gbar_D06	58285528	58288145	AT3G27500
Gbar_D06G019450	Gbar_D06	58291152	58292038	-
Gbar_D06G019460	Gbar_D06	58292171	58298366	AT3G49601
Gbar_D06G019470	Gbar_D06	58299849	58302016	AT4G11550
Gbar_D06G019480	Gbar_D06	58318908	58320260	-
Gbar_D06G019970	Gbar_D06	59254945	59256264	AT2G02990
Gbar_D06G019980	Gbar_D06	59278788	59284505	AT3G15140
Gbar_D06G019990	Gbar_D06	59285656	59289061	AT5G13500
Gbar_D06G020000	Gbar_D06	59293131	59303898	-
Gbar_D06G020010	Gbar_D06	59306636	59314151	AT3G55850
Gbar_D06G020020	Gbar_D06	59315098	59318472	AT2G31890
Gbar_D06G020030	Gbar_D06	59330807	59342018	AT3G54440
Gbar_D06G020040	Gbar_D06	59343558	59359388	AT2G40030
Gbar_D06G020050	Gbar_D06	59370278	59372342	AT3G10710
Gbar_D06G020060	Gbar_D06	59377256	59380625	AT5G09850
Gbar_D06G020070	Gbar_D06	59382371	59383160	AT5G57655
Gbar_D06G020080	Gbar_D06	59383846	59388785	AT5G57655
Gbar_D06G020090	Gbar_D06	59390254	59396796	AT3G07530
Gbar_D06G020100	Gbar_D06	59423857	59427583	AT2G40460
Gbar_D06G020110	Gbar_D06	59428446	59434684	AT2G19260
Gbar_D06G020120	Gbar_D06	59435186	59438990	-
Gbar_D07G016760	Gbar_D07	28024825	28036365	AT1G04120
Gbar_D07G016770	Gbar_D07	28099212	28105662	AT2G20340
Gbar_D07G016780	Gbar_D07	28146407	28148601	AT3G06270
Gbar_D07G016790	Gbar_D07	28159075	28161750	AT5G43940
Gbar_D07G016800	Gbar_D07	28179557	28187304	AT1G04140
Gbar_D08G012560	Gbar_D08	38815902	38821076	AT1G55090
Gbar_D08G012570	Gbar_D08	38823479	38827293	AT5G42020
Gbar_D08G012580	Gbar_D08	38856062	38858496	AT4G10850
Gbar_D08G012590	Gbar_D08	38885955	38891561	AT4G24020
Gbar_D08G012600	Gbar_D08	38915225	38917600	AT5G46290
Gbar_D08G012610	Gbar_D08	38969012	38971736	AT4G16580
Gbar_D09G001750	Gbar_D09	4938734	4947189	AT5G63140
Gbar_D09G001760	Gbar_D09	5107143	5110230	AT5G63140
Gbar_D09G008200	Gbar_D09	31792651	31794784	-
Gbar_D09G008210	Gbar_D09	31810300	31818190	AT3G14270
Gbar_D09G008220	Gbar_D09	31818823	31820322	-
Gbar_D09G008230	Gbar_D09	31833165	31836629	AT3G14290
Gbar_D09G008240	Gbar_D09	31844725	31848458	AT4G34480
Gbar_D09G008250	Gbar_D09	31865438	31866635	-
Gbar_D09G008260	Gbar_D09	31872361	31876371	AT1G17270
Gbar_D09G008270	Gbar_D09	31877615	31882352	AT3G14360
Gbar_D09G008280	Gbar_D09	31899731	31905036	AT1G79650
Gbar_D09G008290	Gbar_D09	31905539	31905754	-
Gbar_D09G008300	Gbar_D09	31953248	31963823	AT1G56130
Gbar_D09G008310	Gbar_D09	31967134	31967656	AT1G31335
Gbar_D09G008360	Gbar_D09	32045791	32047479	AT5G45100
Gbar_D09G008370	Gbar_D09	32048682	32056221	AT1G30270
Gbar_D09G008380	Gbar_D09	32096686	32103300	AT5G46190
Gbar_D09G008390	Gbar_D09	32143620	32148777	AT3G14420
Gbar_D09G008400	Gbar_D09	32153560	32155210	AT1G30135
Gbar_D09G008410	Gbar_D09	32185457	32193818	-
Gbar_D09G008420	Gbar_D09	32196686	32199868	AT1G30090
Gbar_D09G008450	Gbar_D09	32280328	32283642	-
Gbar_D09G008460	Gbar_D09	32359618	32364284	-
Gbar_D09G008470	Gbar_D09	32367791	32368037	-
Gbar_D09G008480	Gbar_D09	32368231	32371647	AT2G34460
Gbar_D09G008490	Gbar_D09	32376147	32380590	AT5G46290
Gbar_D09G008500	Gbar_D09	32427631	32435496	AT4G18230
Gbar_D09G008510	Gbar_D09	32431776	32434805	AT4G18220
Gbar_D09G008520	Gbar_D09	32455184	32458581	AT1G60970
Gbar_D09G008530	Gbar_D09	32462059	32465065	AT1G29380
Gbar_D09G008540	Gbar_D09	32465614	32468230	AT1G29390
Gbar_D09G008550	Gbar_D09	32477663	32481870	AT4G18100
Gbar_D09G008560	Gbar_D09	32484013	32489340	AT1G78580
Gbar_D09G008570	Gbar_D09	32507677	32510556	AT5G46460
Gbar_D09G008570	Gbar_D09	32507677	32510556	AT5G46460
Gbar_D09G008580	Gbar_D09	32511594	32521383	AT1G78580
Gbar_D09G008580	Gbar_D09	32511594	32521383	AT1G78580
Gbar_D09G008590	Gbar_D09	32556210	32569105	AT3G14120
Gbar_D09G008590	Gbar_D09	32556210	32569105	AT3G14120
Gbar_D09G008600	Gbar_D09	32572787	32581761	AT1G72500
Gbar_D09G008600	Gbar_D09	32572787	32581761	AT1G72500
Gbar_D09G008610	Gbar_D09	32633029	32634008	AT1G72610
Gbar_D09G008610	Gbar_D09	32633029	32634008	AT1G72610
Gbar_D09G008620	Gbar_D09	32659090	32659573	-
Gbar_D09G008630	Gbar_D09	32669072	32675135	AT5G13640
Gbar_D09G008640	Gbar_D09	32678825	32682301	AT1G54270
Gbar_D09G008930	Gbar_D09	33085682	33091072	AT1G79930
Gbar_D09G008940	Gbar_D09	33106396	33108481	AT3G24490
Gbar_D09G008950	Gbar_D09	33109333	33113387	AT5G11460
Gbar_D09G008960	Gbar_D09	33119616	33124965	AT3G16000
Gbar_D09G008970	Gbar_D09	33126043	33129592	AT1G79985
Gbar_D09G008980	Gbar_D09	33133542	33143382	AT1G52360
Gbar_D09G008990	Gbar_D09	33161202	33162886	-
Gbar_D09G009000	Gbar_D09	33172575	33173167	-
Gbar_D09G009010	Gbar_D09	33185451	33187930	AT1G48090
Gbar_D09G009020	Gbar_D09	33195443	33197024	AT4G10720
Gbar_D09G009030	Gbar_D09	33198891	33200424	AT4G10720
Gbar_D09G009040	Gbar_D09	33231070	33231848	-
Gbar_D09G009050	Gbar_D09	33233452	33239770	AT4G13350
Gbar_D09G009060	Gbar_D09	33245414	33250088	AT1G80000
Gbar_D09G009070	Gbar_D09	33251460	33256816	AT1G15660
Gbar_D09G013360	Gbar_D09	39362352	39367885	AT3G57880
Gbar_D09G013370	Gbar_D09	39391239	39391439	-
Gbar_D09G013380	Gbar_D09	39402539	39412046	AT3G57890
Gbar_D09G013390	Gbar_D09	39414154	39417374	AT2G42210
Gbar_D09G013400	Gbar_D09	39433121	39438670	AT5G06830
Gbar_D09G013410	Gbar_D09	39438867	39444499	AT5G06820
Gbar_D09G013420	Gbar_D09	39444669	39448089	AT3G57910
Gbar_D09G013430	Gbar_D09	39468472	39470522	AT5G06800
Gbar_D09G013440	Gbar_D09	39488533	39489135	AT5G06790
Gbar_D09G013450	Gbar_D09	39493037	39493820	-
Gbar_D09G013460	Gbar_D09	39497350	39497613	-
Gbar_D09G013470	Gbar_D09	39516910	39517584	-
Gbar_D10G015770	Gbar_D10	34916728	34922338	AT4G14720
Gbar_D10G020600	Gbar_D10	55050656	55056426	AT3G14470
Gbar_D10G020610	Gbar_D10	55062549	55068257	AT3G14470
Gbar_D10G020620	Gbar_D10	55151911	55156854	AT3G14470
Gbar_D10G020630	Gbar_D10	55159570	55167920	-
Gbar_D10G020640	Gbar_D10	55181092	55181538	AT4G12490
Gbar_D10G020650	Gbar_D10	55185127	55185574	AT4G12490
Gbar_D10G020660	Gbar_D10	55188762	55189208	AT4G12490
Gbar_D10G020670	Gbar_D10	55207574	55208020	AT4G12520
Gbar_D10G020680	Gbar_D10	55211092	55212283	-
Gbar_D10G020690	Gbar_D10	55215496	55219384	AT1G74320
Gbar_D10G020700	Gbar_D10	55219434	55222278	-
Gbar_D10G026870	Gbar_D10	65508961	65509671	-
Gbar_D10G026880	Gbar_D10	65511741	65512925	AT3G51930
Gbar_D10G026890	Gbar_D10	65513680	65515867	AT3G51940
Gbar_D10G026900	Gbar_D10	65516810	65518506	AT1G74120
Gbar_D10G026910	Gbar_D10	65518942	65524563	AT1G30610
Gbar_D10G026920	Gbar_D10	65528101	65530234	AT5G13460
Gbar_D10G026930	Gbar_D10	65537290	65539814	AT3G63440
Gbar_D10G026940	Gbar_D10	65540457	65545506	AT3G57330
Gbar_D10G026950	Gbar_D10	65547570	65550030	AT2G44580
Gbar_D10G026960	Gbar_D10	65555133	65561802	AT3G60160
Gbar_D10G026970	Gbar_D10	65562633	65564034	-
Gbar_D10G026980	Gbar_D10	65564832	65568474	-
Gbar_D10G026990	Gbar_D10	65568578	65569948	AT5G46680
Gbar_D10G027000	Gbar_D10	65578496	65582898	AT5G46570
Gbar_D10G027010	Gbar_D10	65583709	65620038	AT5G16715
Gbar_D10G027020	Gbar_D10	65602318	65604903	-
Gbar_D10G027030	Gbar_D10	65626394	65627322	-
Gbar_D10G027040	Gbar_D10	65643887	65646670	AT1G09660
Gbar_D10G027050	Gbar_D10	65663742	65665397	AT1G18600
Gbar_D10G027060	Gbar_D10	65667145	65668659	AT1G26500
Gbar_D10G027070	Gbar_D10	65672669	65674087	-
Gbar_D11G018340	Gbar_D11	18927797	18932737	AT1G65930
Gbar_D11G018350	Gbar_D11	18934267	18939531	AT5G17310
Gbar_D11G018360	Gbar_D11	18941724	18943648	AT3G03210
Gbar_D11G018370	Gbar_D11	18963027	18968391	AT5G17290
Gbar_D11G018380	Gbar_D11	18977378	18980856	AT2G39840
Gbar_D11G018390	Gbar_D11	18994592	18999234	AT4G31770
Gbar_D11G018400	Gbar_D11	19033663	19036739	AT1G65910
Gbar_D11G018410	Gbar_D11	19044666	19045452	-
Gbar_D11G018420	Gbar_D11	19052766	19058215	AT1G65920
Gbar_D11G026590	Gbar_D11	52731907	52737775	AT3G05950
Gbar_D11G026600	Gbar_D11	52753639	52763463	AT5G39110
Gbar_D11G026610	Gbar_D11	52764613	52765423	AT3G05950
Gbar_D11G026620	Gbar_D11	52772094	52772816	-
Gbar_D11G026630	Gbar_D11	52847864	52848591	-
Gbar_D11G026640	Gbar_D11	52857126	52857936	AT3G05950
Gbar_D11G026650	Gbar_D11	52859079	52870316	AT5G39110
Gbar_D11G026660	Gbar_D11	52892531	52893586	AT1G25210
Gbar_D11G026670	Gbar_D11	52897926	52898736	AT3G05950
Gbar_D11G026870	Gbar_D11	54083297	54083966	-
Gbar_D11G026880	Gbar_D11	54098235	54098887	-
Gbar_D11G026890	Gbar_D11	54100587	54101601	-
Gbar_D11G026900	Gbar_D11	54102157	54107611	AT5G18480
Gbar_D11G026910	Gbar_D11	54138646	54142212	AT3G14470
Gbar_D11G026920	Gbar_D11	54156122	54159461	AT1G08590
Gbar_D11G026930	Gbar_D11	54159513	54170556	AT3G04340
Gbar_D11G026940	Gbar_D11	54172378	54187307	AT1G08600
Gbar_D11G026950	Gbar_D11	54188655	54192719	AT3G04350
Gbar_D11G026960	Gbar_D11	54264048	54265381	AT3G04360
Gbar_D12G006930	Gbar_D12	12348095	12348505	-
Gbar_D12G006940	Gbar_D12	12367494	12368185	AT2G23690
Gbar_D12G006950	Gbar_D12	12372672	12377488	AT3G18990
Gbar_D12G006960	Gbar_D12	12440970	12443921	-
Gbar_D12G006970	Gbar_D12	12466814	12467757	-
Gbar_D12G006980	Gbar_D12	12513811	12514937	-
Gbar_D12G006990	Gbar_D12	12514985	12517209	AT3G18990
Gbar_D12G016810	Gbar_D12	46169581	46171816	-
Gbar_D12G016820	Gbar_D12	46201958	46212854	AT1G60670
Gbar_D12G016830	Gbar_D12	46212876	46217711	AT1G10850
Gbar_D12G016840	Gbar_D12	46226251	46229981	AT3G11920
Gbar_D12G016850	Gbar_D12	46255162	46259096	AT2G37790
Gbar_D12G016860	Gbar_D12	46259454	46262139	AT1G14520
Gbar_D12G016870	Gbar_D12	46269102	46277976	AT2G02180
Gbar_D12G016880	Gbar_D12	46309418	46316012	AT3G19830
Gbar_D12G016890	Gbar_D12	46330033	46331984	AT3G01190
Gbar_D12G016900	Gbar_D12	46344334	46345092	AT2G32350
Gbar_D12G016910	Gbar_D12	46347838	46349428	-
Gbar_D12G016920	Gbar_D12	46360051	46360636	AT3G05975
Gbar_D12G016930	Gbar_D12	46380588	46381188	-
Gbar_D13G009330	Gbar_D13	19834286	19834880	-
Gbar_D13G009340	Gbar_D13	19835123	19840283	AT1G13580
Gbar_D13G009350	Gbar_D13	19868324	19869575	-
Gbar_D13G009360	Gbar_D13	19909132	19909626	-
Gbar_D13G009370	Gbar_D13	19943578	19944425	AT1G26220
Gbar_D13G009620	Gbar_D13	21697086	21704144	AT1G65470
Gbar_D13G009630	Gbar_D13	21802603	21817311	AT5G16270
Gbar_D13G011090	Gbar_D13	30204112	30226907	AT5G56360
Gbar_D13G011100	Gbar_D13	30228622	30231984	AT5G56350
Gbar_D13G011110	Gbar_D13	30230715	30232114	AT1G55530
Gbar_D13G011120	Gbar_D13	30245555	30246618	-
Gbar_D13G011130	Gbar_D13	30267793	30270055	AT1G08570
Gbar_D13G011140	Gbar_D13	30285229	30285898	-
Gbar_D13G011150	Gbar_D13	30360698	30365802	-
Gbar_D13G013210	Gbar_D13	39284118	39290837	AT1G65280
Gbar_D13G013220	Gbar_D13	39400833	39403840	AT1G71930
Gbar_D13G013230	Gbar_D13	39404715	39405826	-
Gbar_D13G013240	Gbar_D13	39445246	39447783	-
Gbar_D13G013250	Gbar_D13	39449735	39456928	AT1G22700
Gbar_D13G013260	Gbar_D13	39458227	39461874	AT1G22710
Gbar_D13G013690	Gbar_D13	41799773	41801843	AT1G16310
Gbar_D13G013700	Gbar_D13	41803658	41806401	AT4G27500
Gbar_D13G013710	Gbar_D13	41932654	41934413	AT1G16390
Gbar_D13G020250	Gbar_D13	54602251	54604970	AT5G25360
Gbar_D13G020260	Gbar_D13	54613675	54618702	AT5G11200
Gbar_D13G020270	Gbar_D13	54619695	54621451	AT5G25400
Gbar_D13G020280	Gbar_D13	54622641	54625500	AT2G26690
Gbar_D13G020290	Gbar_D13	54630579	54633360	-
Gbar_D13G020300	Gbar_D13	54638886	54639699	-
Gbar_D13G020310	Gbar_D13	54640242	54640994	AT4G28088
Gbar_D13G020320	Gbar_D13	54643343	54649570	AT5G57940
Gbar_D13G020330	Gbar_D13	54649645	54652931	AT2G24170
Gbar_D13G020340	Gbar_D13	54655111	54658973	AT2G24200
Gbar_D13G020350	Gbar_D13	54673554	54677520	AT5G57970
Gbar_D13G020360	Gbar_D13	54677608	54680907	AT2G24230
Gbar_D13G020370	Gbar_D13	54682910	54687677	AT4G30950
Gbar_D13G020380	Gbar_D13	54702134	54706043	AT5G20710
Gbar_D13G020390	Gbar_D13	54708975	54721176	AT5G58160
Gbar_D13G020400	Gbar_D13	54722667	54725411	AT5G58000
Gbar_D13G020410	Gbar_D13	54726003	54726343	-
Gbar_D13G020420	Gbar_D13	54740023	54742026	AT4G30960
Gbar_D13G020430	Gbar_D13	54746092	54746406	-
Gbar_D13G020440	Gbar_D13	54772923	54775204	AT2G32060
Gbar_D13G020450	Gbar_D13	54775713	54778145	AT5G58020
Gbar_D13G020460	Gbar_D13	54780485	54784643	AT5G58030
Gbar_D13G020470	Gbar_D13	54785718	54785939	-
